# Supplementary material for: A non-inferiority trial comparing the accuracy of classifying urinary gram-stain findings between an artificial intelligence smartphone-based application and microbiology specialists
Source: Research Square preprint supplement (doi:10.21203/rs.3.rs-4284383/v1), 2024-04-26
Supplement: Supplementary file 1 [file fa3d905f3bae62ac4ff74c81.docx]

**Supplementary materials**

A non-inferiority trial comparing the accuracy of classifying urinary gram-stain findings between an artificial intelligence smartphone-based application and microbiology specialists

Kei Yamamoto a, Goh Ohji b,c, Isao Miyatsuka d, Kei Furui-Ebisawa b, Ataru Moriya e,f, Shogo Maeta d, Hidetoshi Nomoto a, Masami Kurokawa e, Kenichiro Ohnuma c, Mari Kusuki c, Yukari Uemura g, Norio Ohmagari a

a Disease Control and Prevention Centre, National Centre for Global Health and Medicine, Tokyo, Japan

b Division of Infectious Diseases Therapeutics, Department of Microbiology and Infectious Diseases, Kobe University Graduate School of Medicine, Kobe, Japan

c Department of Clinical Laboratory, Kobe University Hospital, Kobe Japan

d CarbGeM Inc., Tokyo, Japan

e Department of Clinical Laboratory, National Centre for Global Health and Medicine, Tokyo, Japan

f Department of Clinical Laboratory, Ibaraki Higashi National Hospital

g Centre for Clinical Sciences, National Centre for Global Health and Medicine, Tokyo, Japan

**Corresponding Author**:

Kei Yamamoto

Disease Control and Prevention Centre, National Centre for Global Health and Medicine, 1-21-1 Toyama, Shinjuku-ku, Tokyo 162-8655, Japan.

Phone: +81-3-3202-7181

Fax: +81-3-3202-1012

E-mail address: kyamamoto@hosp.ncgm.go.jp

Supplementary Appendix S1. Artificial intelligence (AI) model building

*Data collection*

1. The 1,350 specimens for AI model building were collected between February 1, 2020, and March 30, 2023 (excluding between April 1, 2022, and December 31, 2022), from existing anonymized National Centre for Global Health and Medicine (NCGM) and Kobe University Hospital (KUH) registries.
2. The bacterial species and the number of slides collected.

|  | Slides from NCGM | Slides from KUH | Total |
| --- | --- | --- | --- |
| Polymicrobial | 144 | 18 | 162 |
| None | 46 | 14 | 60 |
| *Candida* spp. | 103 | 33 | 136 |
| GPC cluster | 63 | 22 | 85 |
| *Enterococcus faecalis* | 37 | 30 | 67 |
| *Enterococcus faecium* | 19 | 20 | 39 |
| *Streptococcus agalactiae* | 22 | 21 | 43 |
| Other GPC | 15 | 20 | 35 |
| *Corynebacterium* spp. | 32 | 38 | 70 |
| *Enterobacter cloacae* | 16 | 27 | 43 |
| *Escherichia coli* | 235 | 56 | 291 |
| *Klebsiella oxytoca* | 18 | 28 | 46 |
| *Klebsiella pneumoniae* | 65 | 27 | 92 |
| Other GNR *Enterobacteriaceae* | 65 | 20 | 85 |
| *Pseudomonas aeruginosa* | 32 | 15 | 47 |
| Other GNR glucose non-fermenting bacteria | 5 | 22 | 27 |
| GNC | 7 | 10 | 17 |
| *Others | 5 | - | 5 |
| Total | 929 | 421 | 1350 |
| GPC, Gram-positive cocci; GNC, Gram-negative cocci; GNR, Gram-negative rod. | | | |

* Unlike the Polymicrobial definition, a slide on which two types of bacteria are detected by GNR classification or two types of bacteria are detected by GPC classification in the image taken from the slide. They are used for modeling as GNR (1 slide) and GPC (4 slides) for Class 1 classification, but not for Class 2 classification.

*AI model building*

1. We used Python as the language and PyTorch (https://pytorch.org/), along with its wrapper PyTorch Lightning (https://lightning.ai/pytorch-lightning), as the deep learning framework to construct the AI model.
2. A total of 13,901 images (from 1,350 slides) were used to build the AI model.
3. To prevent the learning of slide-by-slide features rather than bacterial features, data splitting was performed on a per-slide basis rather than on the entire image. This ensured that images derived from the same slide did not cross over into the training, validation, or test datasets.
4. We created three types of models: a model that classifies seven categories of morphology, including 1) yeast (*Candida* spp.), 2) Gram-positive cocci (GPC), 3) Gram-positive rod (GPR), 4) Gram-negative rod (GNR), 5) Gram-negative cocci (GNC), 6) non-fermenting bacterial class, and 7) multiple bacterial class (Class 1 model). A model that classifies the bacterial species as GPC in the Class 1 model (GPC model) and another that classifies them as GNR in the Class 1 model (GNR model).
5. We created the Class 1 model as a multi-label classification model, and the GPC and GNR models as multi-class image classification models.
6. We used a fine turning technique based on the ConvNeXt [1] convolutional neural network (CNN) architecture pre-trained on the ImageNet Large Scale Visual Recognition Competition (ILSVRC) 2012 image database [2].
7. We used 20% of all slides as the test dataset and divided the remaining 80% into four parts. We performed a four-fold cross-validation (4-fold CV) by using three of the four parts as the training dataset (training) and the remaining part as the validation dataset. We then built a model. Since there was only one clinical specimen for GNC, the images of the clinical specimen were divided in the same proportion as above to construct the dataset.
8. The batch size was set to 32 since we used Gradient Accumulation with a mini-batch size of 2 and 16 gradient accumulations.
9. As for the loss function, we used Multi-Label Evidential Loss [3] for the Class 1 model and Evidential Loss [4] for the remaining two models.
10. We used AdamW [5] as an optimiser.
11. Data augmentation was performed using the RandAugment [6] module in PyTorch.
12. For the construction of the Class 1 model, we also used an augmentation method called mixup [7], which combines multiple images.
13. As evaluation metrics, we used accuracy, recall, precision, and f_β (β=0.5). We monitored recall on the validation data and adopted the model that achieved the highest score. The f_β score was based on the following equation:
14. We built a model by optimizing the weights using the Model Soups [8] method on the models constructed by the 4-fold CV.

*Model evaluation*

1. During inference, the image was resized to 1024 × 1024 after center cropping of 3024 × 3024 and input to the Class 1 model.
2. If the output of the Class 1 model is GNR or GPC, the corresponding model is used to classify the fungus species, and the Class 1 category and fungus classification results are output.
3. If EvidentailLoss was used as the loss function, the uncertainty u and confidence conf were calculated as follows:

where K is the number of classification classes.

1. When MultilabelEvidentialLoss was used as the loss function, the uncertainty was calculated for each class according to the following equation using two outputs: present (+) and absent (−) for each class.

The maximum value was the output from the following equation, as uncertainty for the image.

1. Apart from the confidence, probabilities were calculated using a sigmoid function for the Class 1 model and a softmax function for the GNR or GPC model.

Supplementary Appendix S2. Procedure for preparing the spiked specimens using ATCC standard strains

1. The stored strain was incubated on a CO2-rich chocolate agar medium for 24 h.
2. The isolating strain was adjusted to a concentration of McFarland 0.5 and further diluted 100-fold.
3. We inoculated 3 mL of medium supplemented with CAMHB (cation-adjusted Muller-Hinton Bouillon) + LHB (horse hemolytic blood) 2.5–5% with 10 µL of the adjusted solution in (2).
4. After incubation in CO2 rich medium overnight (approximately 16–18 h), the culture medium was suspended in bacteria-free urine or saline solution of the same pH, etc., as the urine, and it was applied on a glass slide for Gram staining.

Supplementary Appendix S3. Device and decipherment

The imaging device was an iPhone (Apple, CA, USA; NCGM: iPhone Xs, KUH: iPhone 12) with a rear camera pixel count of at least 12 megapixels. Images were captured using the standard camera application (1.9× optical zoom) with an attachment, NexyZ universal smartphone adapter (CELESTRON, CA, USA), to an optical microscope to focus the image from the microscope eyepiece. For the optical microscopes, at NCGM, BX53 with discussion microscope (OLYMPUS, Tokyo, Japan) and at KUH, CX41LF (OLYMPUS, Tokyo, Japan) were used.

For the CAD used in this study, deep learning with supervised data generated from Gram-stained slides was collected from KUH and NCGM outside this study period and had been registered.

The image datasets for decipherment created at the two facilities were sent to different facilities in anonymized form. Ten MS from each facility performed decipherment on a PC display. After MS deciphering was completed, the same image dataset was sent to the CarbGeM’s laboratory for deciphering by CAD. After CAD deciphering was completed, both decipherment results were sent to each facility where the dataset was created, and the results were checked against the correct data.

Supplementary Table S4. Eligible samples

|  | NCGM | KUH |  |
| --- | --- | --- | --- |
| *Candida* spp. | 29 | 13 |  |
| GPC cluster | 31 | 18 |  |
| *Enterococcus faecalis* | 18 | 9 |  |
| *Enterococcus faecium* | 5 | 1 |  |
| *Streptococcus agalactiae* | 11 | 3 |  |
| Other GPC | 4 | 2 |  |
| *Corynebacterium* spp. | 14 | 5 |  |
| *Enterobacter cloacae* | 6 | 3 |  |
| *Escherichia coli* | 87 | 26 |  |
| *Klebsiella oxytoca* | 7 | 1 |  |
| *Klebsiella pneumoniae* | 17 | 13 |  |
| Other GNR *Enterobacteriaceae* | 13 | 11 |  |
| *Pseudomonas aeruginosa* | 16 | 5 |  |
| Other GNR glucose non-fermenting bacteria | 0 | 0 |  |
| GNC | 0 | 0 |  |
| Polymicrobial | 292 | 419 |  |
| None | 838 | 1,340 |  |
| Total | 1,388 | 1,869 |  |

Supplementary Table S5. Precision, recall, and F1 value (harmonic mean) for Class 2

|  |  | CAD | | | Microbiology specialist | | |
| --- | --- | --- | --- | --- | --- | --- | --- |
|  |  | Precision | Recall | F1 | Precision | Recall | F1 |
| U-01 | *Candida* spp. | 100.0% | 94.4% | 97.1% | 91.7% | 85.6% | 88.5% |
| U-02 | GPC cluster | 64.7% | 61.1% | 62.9% | 47.4% | 66.7% | 55.4% |
| U-03 | *Enterococcus faecalis* | 29.8% | 77.8% | 43.1% | 17.4% | 12.8% | 14.7% |
| U-04 | *Enterococcus faecium* | 50.0% | 5.6% | 10.0% | 36.5% | 15.0% | 21.3% |
| U-05 | *Streptococcus agalactiae* | 33.3% | 22.2% | 26.7% | 32.0% | 22.2% | 26.2% |
| U-06 | Other GPC | 30.0% | 16.7% | 21.4% | 18.8% | 31.1% | 23.4% |
| U-07 | *Corynebacterium* spp. | 75.0% | 66.7% | 70.6% | 75.7% | 45.0% | 56.4% |
| U-08 | *Enterobacter cloacae* | 14.3% | 5.6% | 8.0% | 23.3% | 11.1% | 15.0% |
| U-09 | *Escherichia coli* | 35.1% | 72.2% | 47.3% | 14.8% | 29.4% | 19.7% |
| U-10 | *Klebsiella oxytoca* | 35.0% | 38.9% | 36.8% | 14.0% | 3.3% | 5.4% |
| U-11 | *Klebsiella pneumoniae* | 30.0% | 16.7% | 21.4% | 9.2% | 7.2% | 8.1% |
| U-12 | Other GNR *Enterobacteriaceae* | 25.0% | 22.2% | 23.5% | 14.7% | 31.1% | 20.0% |
| U-13 | *Pseudomonas aeruginosa* | 40.6% | 72.2% | 52.0% | 28.4% | 30.6% | 29.4% |
| U-14 | Other GNR glucose non-fermenting bacteria | 20.0% | 5.6% | 8.7% | 13.0% | 10.0% | 11.3% |
| U-15 | GNC | 100.0% | 61.1% | 75.9% | 60.6% | 35.0% | 44.4% |
| Poly | Polymicrobial | 44.4% | 44.4% | 44.4% | 62.5% | 50.0% | 55.6% |
| None | None | 62.1% | 100.0% | 76.6% | 55.8% | 96.7% | 70.7% |

Supplementary Table S6. Classification of Gram-negative rods

(a)CAD

|  |  | Actual values | | |
| --- | --- | --- | --- | --- |
|  |  | GF | NF | Others |
| Predicted values | Glucose fermenters (GF) | 76 | 11 | 14 |
| Glucose non-fermenters (NF) | 12 | 22 | 3 |
| Others | 2 | 3 | 163 |

(b) Microbiology specialist

|  |  | Actual values | | |
| --- | --- | --- | --- | --- |
|  |  | GF | NF | Others |
| Predicted values | Glucose fermenters (GF) | 709 | 198 | 104 |
| Glucose non-fermenters (NF) | 167 | 133 | 32 |
| Others | 24 | 29 | 1,664 |

(c) Precision, recall, and F1 (harmonic mean)

|  | CAD | | | Experts | | |
| --- | --- | --- | --- | --- | --- | --- |
|  | Precision | Recall | F1 | Precision | Recall | F1 |
| Glucose fermenters (GF) | 75.2% | 84.4% | 79.6% | 78.8% | 70.1% | 74.2% |
| Glucose non-fermenters (NF) | 59.5% | 61.1% | 60.3% | 36.9% | 40.1% | 38.4% |

References

1. Liu Z, Mao H, Wu CY, Feichtenhofer C, Darrell T, Xie S. A ConvNet for the 2020s. In: Proceedings of the IEEE/CVF conference on computer vision and pattern recognition (CVPR); 2022:11966-76. doi:[10.1109/CVPR52688.2022.01167](https://doi.org/10.1109/CVPR52688.2022.01167).

2. Russakovsky O, Deng J, Su H, Krause J, Satheesh S, Ma S, et al. ImageNet large scale visual recognition challenge. Int J Comput Vis. 2015;115(3):211-52. doi:[10.1007/s11263-015-0816-y](https://doi.org/10.1007/s11263-015-0816-y).

3. Zhao C, Hu C, Shao H, Wang Z, Wang Y 2022. Towards trustworthy multi-label sewer defect classification via evidential deep learning. arxiv https://arxiv.org/abs/2210.13782. doi:[10.1109/ICASSP49357.2023.10096569](https://doi.org/10.1109/ICASSP49357.2023.10096569).

4. Sensoy M, Kaplan L, Kandemir M. Evidential deep learning to quantify classification uncertainty. arxiv https://arxiv.org/abs/1806.01768. 2019;2018.

5. Loshchilov I, Hutter F. Decoupled weight decay regularization. [arxiv https://arxiv.org/abs/1711.05101].

6. Cubuk ED, Zoph B, Shlens J, Le QV 2019. RandAugment: practical automated data augmentation with a reduced search space. arxiv https://arxiv.org/abs/1909.13719. doi:[10.1109/CVPRW50498.2020.00359](https://doi.org/10.1109/CVPRW50498.2020.00359).

7. Zhang H, Cisse M, Dauphin YN, Lopez-Paz D 2018. mixup: Beyond empirical risk minimization. [arxiv https://arxiv.org/abs/1710.09412?ref=inference.vc].

8. Wortsman M, Ilharco G, Gadre SY, et al. 2022. Model soups: averaging weights of multiple fine-tuned models improves accuracy without increasing inference time. arxiv https://arxiv.org/abs/2203.05482.
